# Supplementary material for: Field dissipation and plant uptake of benzotriazole ultraviolet stabilizers in biosolid-amended soils
Source: Royal Society of Chemistry journal article supplement (doi:10.1039/c3em00568b), 2013-12-19
Supplement: c3em00568b.pdf [file c3em00568b.pdf]

## Supplementary information

### Field dissipation and plant uptake of benzotriazole ultraviolet stabilizers in biosolid-amended soils

Hua-Jie Lai <sup>a</sup>, Guang-Guo Ying <sup>a\*</sup>, Yi-Bing Ma <sup>b</sup>, Zhi-Feng Chen <sup>a</sup>, Feng Chen <sup>a</sup>,  
You-Sheng Liu <sup>a</sup>

<sup>a</sup> State Key Laboratory of Organic Geochemistry, CAS Centre for Pearl River Delta  
Environmental Pollution and Control Research, Guangzhou Institute of Geochemistry,  
Chinese Academy of Sciences, Guangzhou 510640, China

<sup>b</sup> Ministry of Agriculture Key Laboratory of Plant Nutrition and Nutrient Cycling,  
Institute of Agricultural Resources and Regional Planning, Chinese Academy of  
Agricultural Sciences, Beijing, 100081, China.

\* Corresponding author. Phone/fax: +86 20 85290200.

Email address: [guangguo.ying@gmail.com](mailto:guangguo.ying@gmail.com); [guang-guo.ying@gig.ac.cn](mailto:guang-guo.ying@gig.ac.cn).

## Content:

### Figure Captions:

**Fig. S1** Field dissipation of UV-326, UV-327, UV-328, UV-329 and UV-P in the biosolid-amended soils of OT2 within one year (October 2010 to October 2011). OT2: 10 t/ha of biosolid applied in the plots every year since first application in October 2006.

**Fig. S2** Field dissipation of UV-326, UV-327, UV-328, UV-329 and UV-P in the biosolid-amended soils of OT3 within one year (October 2010 to October 2011). OT3: 20 t/ha of biosolid applied in the plots every year since first application in October 2006.

**Fig. S3** Field dissipation of UV-326, UV-327, UV-328, UV-329 and UV-P in the biosolid-amended soils of OT4 within one year (October 2010 to October 2011). OT4: 40 t/ha of biosolid applied in the plots every year since first application in October 2006.

**Fig. S4** Field dissipation of UV-326, UV-327, UV-328, UV-329 and UV-P in the biosolid-amended soils of NT3 within one year (October 2010 to October 2011). NT3: 20 t/ha of biosolid applied once in October 2010.

**Fig. S5** Field dissipation of UV-326, UV-327, UV-328, UV-329 and UV-P in the biosolid-amended soils of NT4 within one year (October 2010 to October 2011). NT4: 40 t/ha of biosolid applied once in October 2010.

### Table Captions:

**Table S1** Characteristic ions and retention times for target compounds in GC-MS.

**Table S2** Recoveries (%) and method precision (RSD % for n = 3), limits of detection (LOD) and quantitation (LOQ) for target compounds.

**Table S3** Concentrations of BUVSs in the biosolid-amended soils of the old group (OT1, OT2, OT3 and OT4) for one year monitoring.

**Table S4** Concentrations of BUVSs in the biosolid-amended soils of the new group (NT2, NT3 and NT4) for one year monitoring.

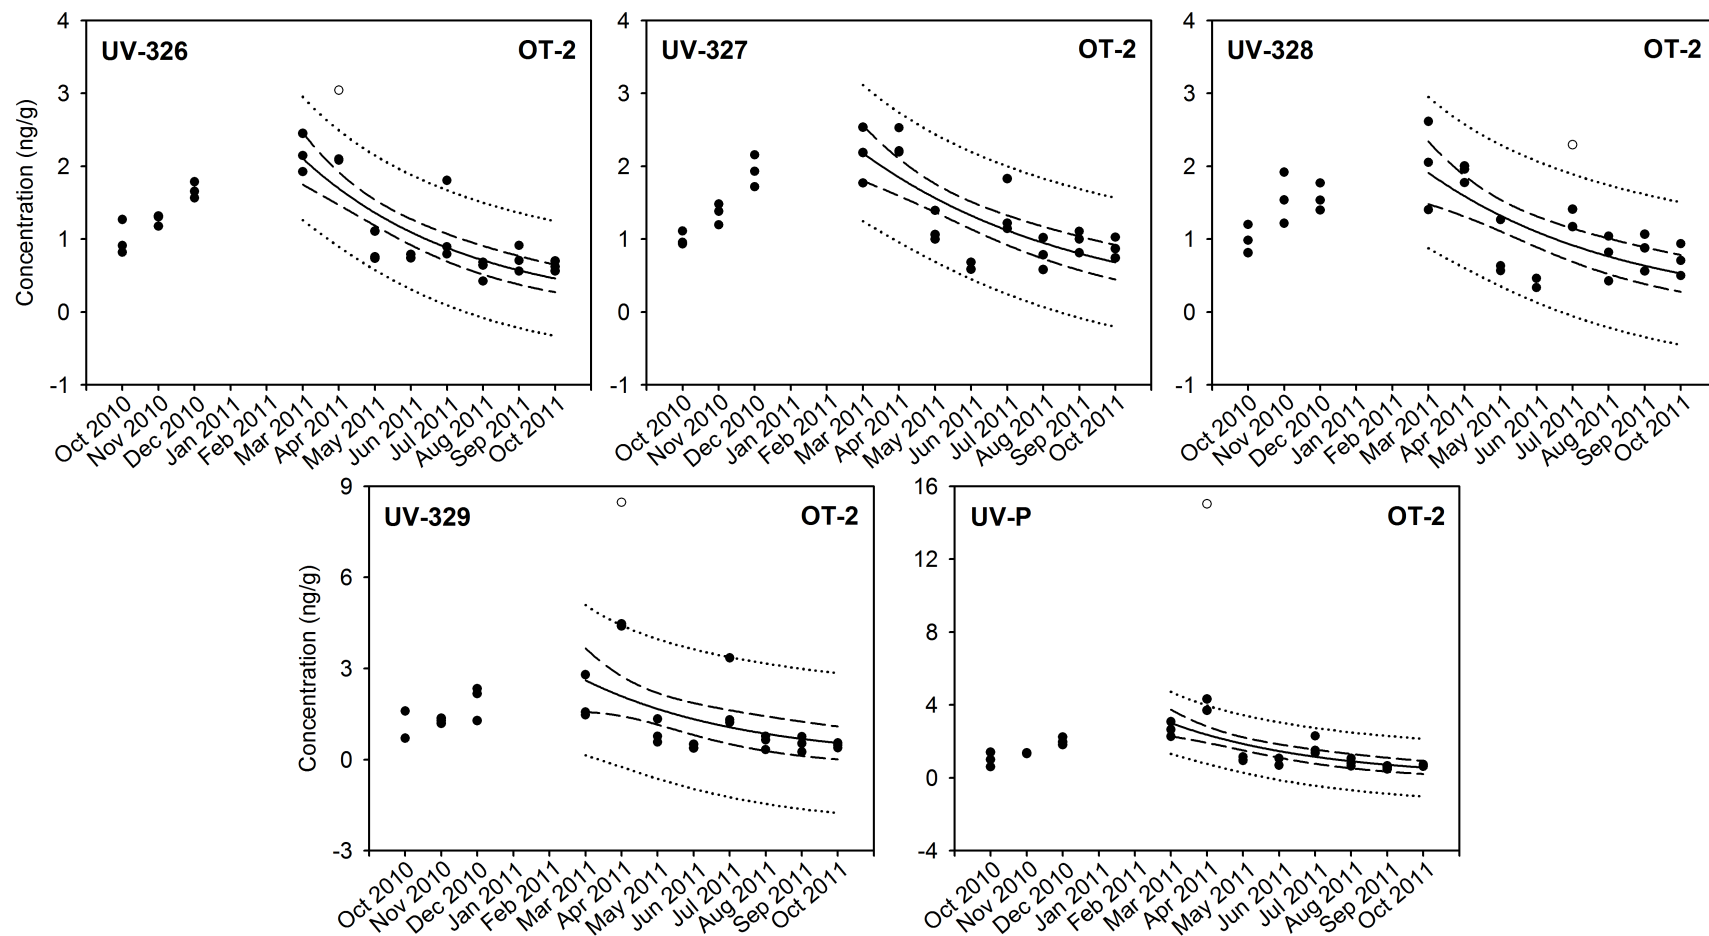

**Fig. S1** Field dissipation of UV-326, UV-327, UV-328, UV-329 and UV-P in the biosolid-amended soils of OT2 within one year (October 2010 to October 2011). OT2: 10 t/ha of biosolid applied in the plots every year since first application in October 2006.

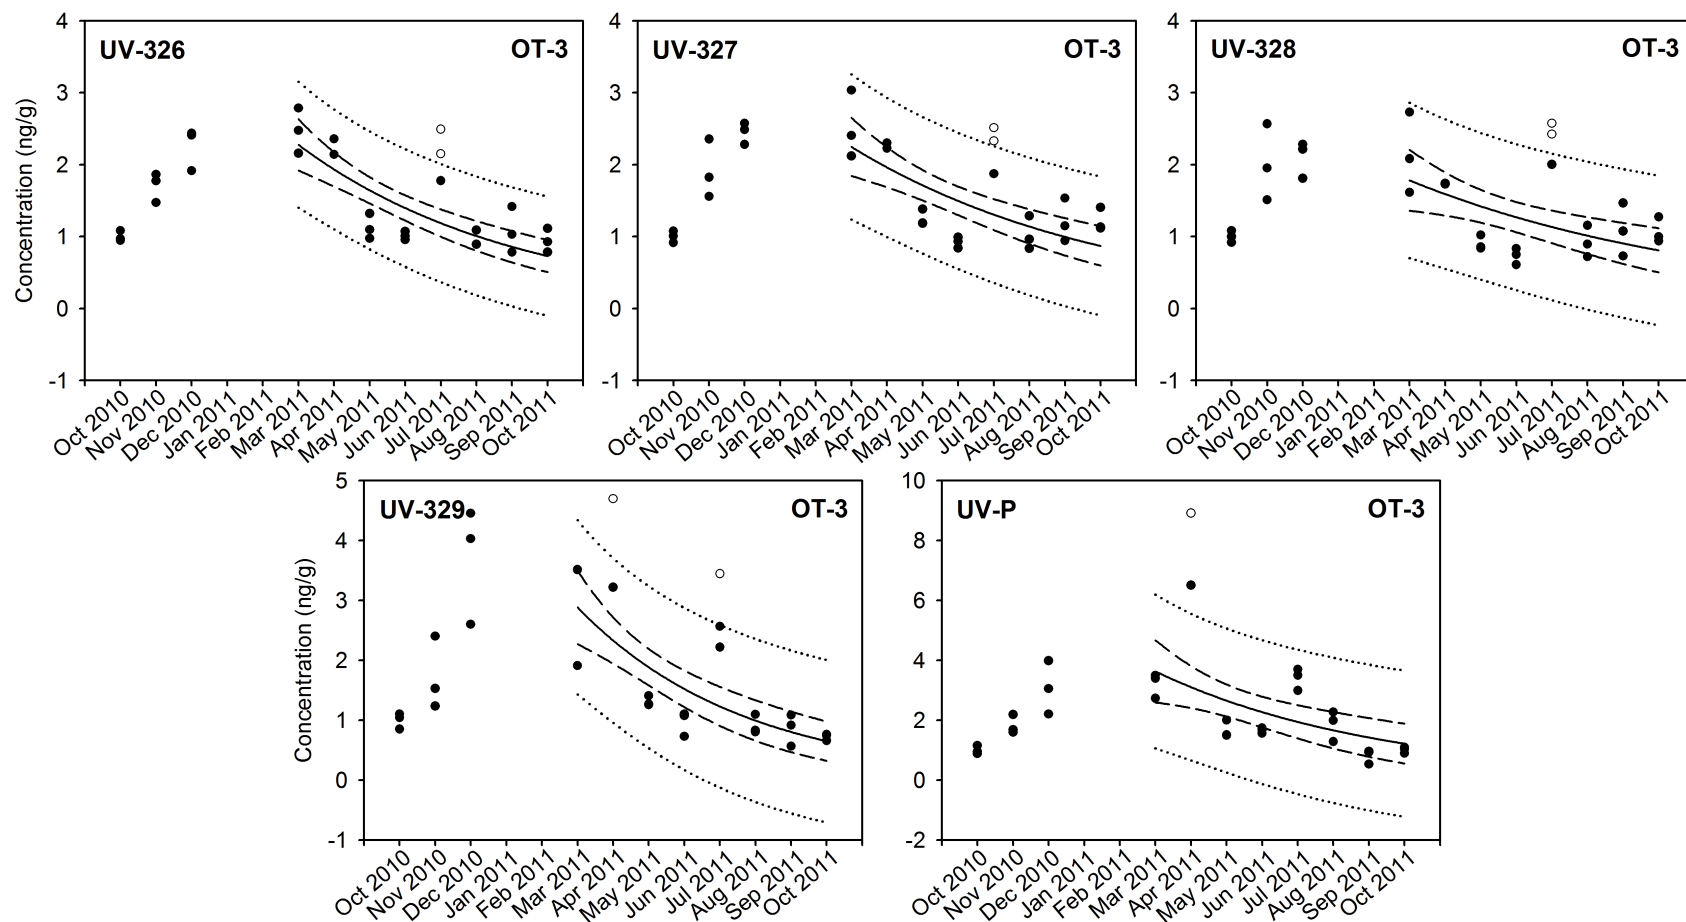

**Fig. S2** Field dissipation of UV-326, UV-327, UV-328, UV-329 and UV-P in the biosolid-amended soils of OT3 within one year (October 2010 to October 2011). OT3: 20 t/ha of biosolid applied in the plots every year since first application in October 2006.

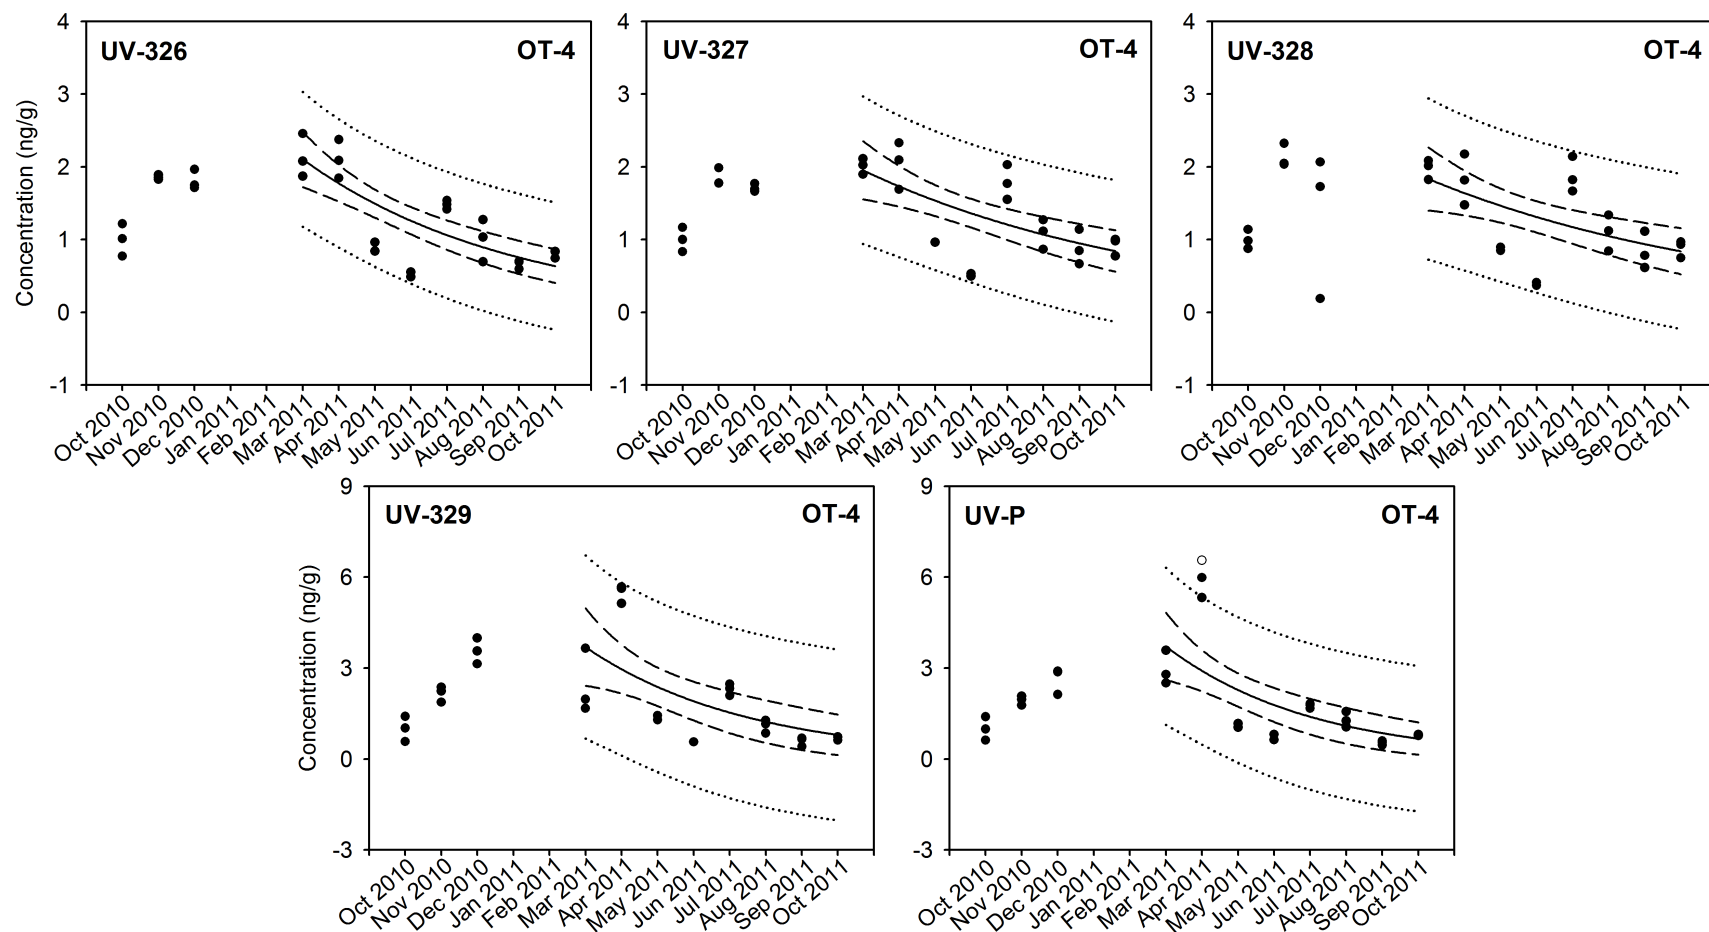

**Fig. S3** Field dissipation of UV-326, UV-327, UV-328, UV-329 and UV-P in the biosolid-amended soils of OT4 within one year (October 2010 to October 2011). OT4: 40 t/ha of biosolid applied in the plots every year since first application in October 2006.

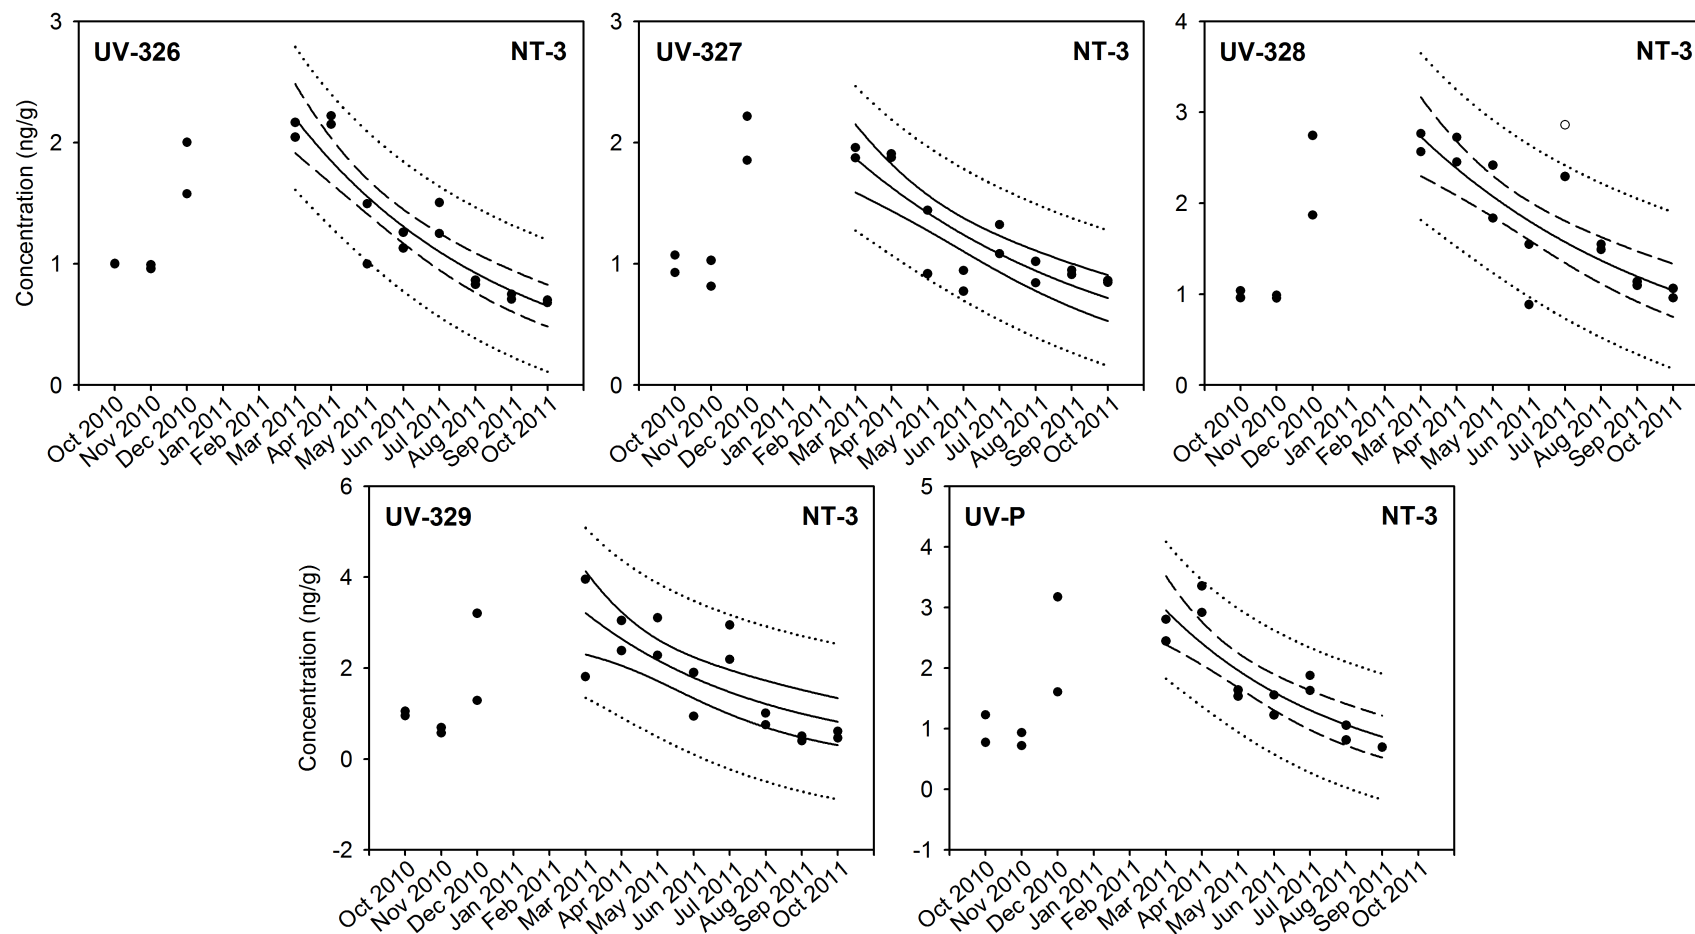

**Fig. S4** Field dissipation of UV-326, UV-327, UV-328, UV-329 and UV-P in the biosolid-amended soils of NT3 within one year (October 2010 to October 2011). NT3: 20 t/ha of biosolid applied once in October 2010.

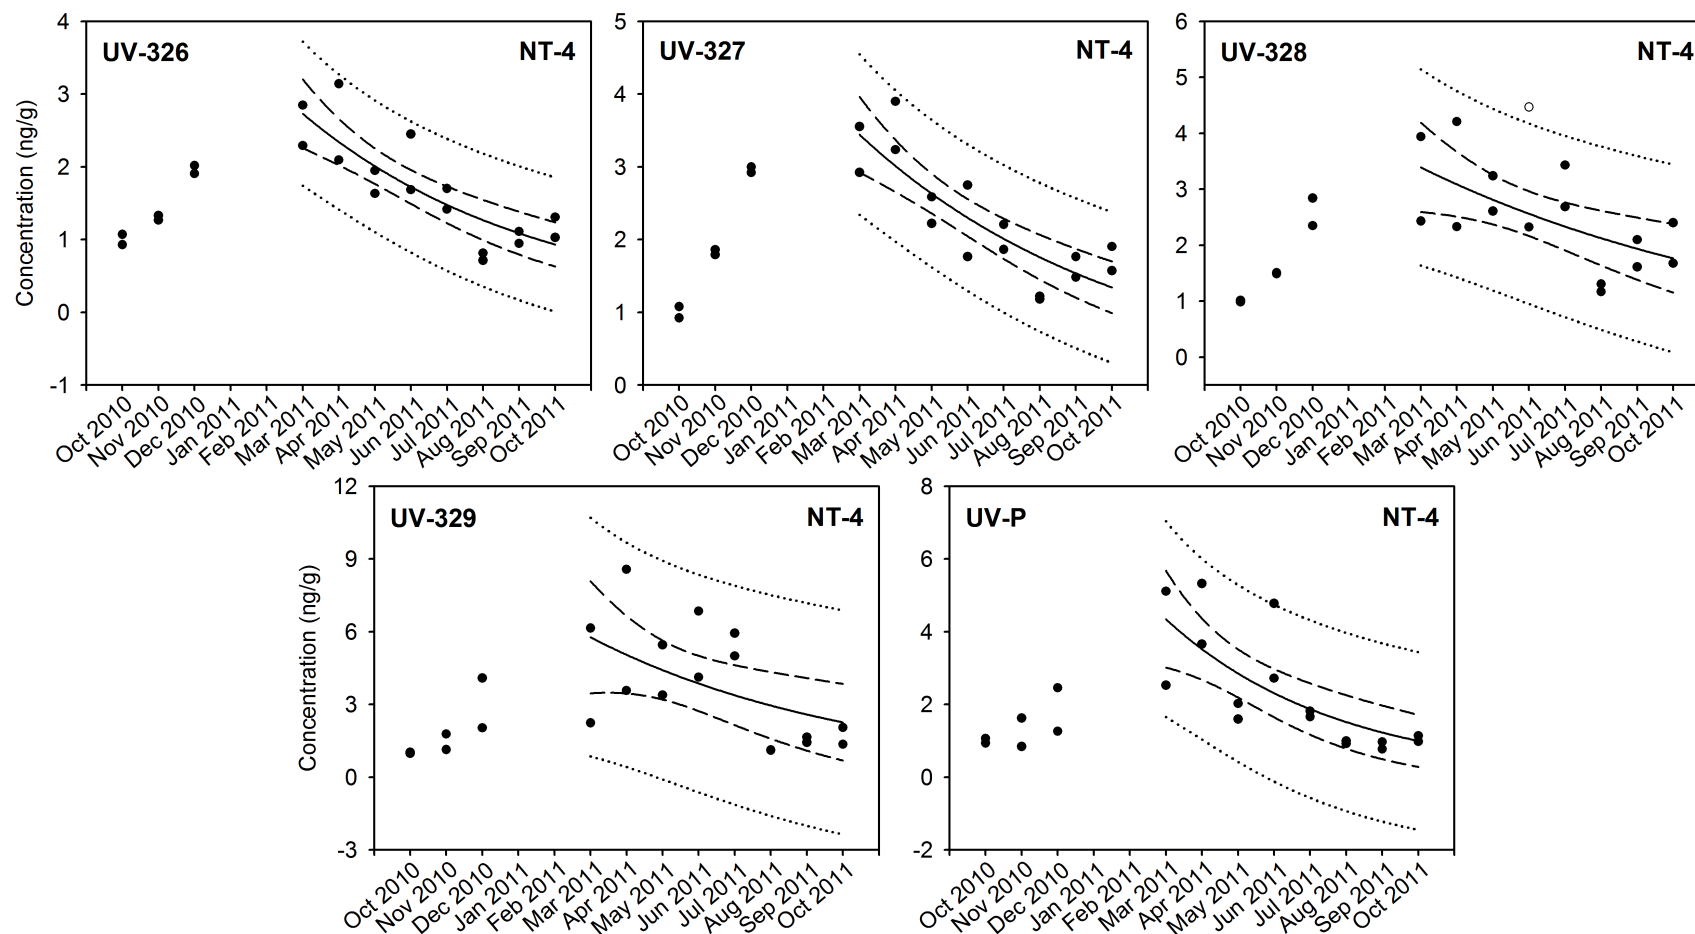

**Fig. S5** Field dissipation of UV-326, UV-327, UV-328, UV-329 and UV-P in the biosolid-amended soils of NT4 within one year (October 2010 to October 2011). NT4: 40 t/ha of biosolid applied once in October 2010.

**Table S1.** Characteristic ions and retention times for target compounds in GC-MS.

| Compound              | M.W. | R.T.   | Ions <sup>a</sup> |     |     |
|-----------------------|------|--------|-------------------|-----|-----|
| Chrysene-d12 (IS)     | 240  | 12.510 | <b>240</b>        | 236 | 241 |
| UV-P                  | 225  | 9.768  | <b>225</b>        | 226 | 224 |
| Benzyl cinnamate (SS) | 238  | 9.893  | <b>131</b>        | 192 | 193 |
| UV-326                | 315  | 12.958 | <b>300</b>        | 315 | 302 |
| UV-329                | 323  | 13.173 | <b>252</b>        | 253 | 323 |
| UV-328                | 351  | 13.779 | <b>322</b>        | 323 | 351 |
| UV-327                | 358  | 13.837 | <b>342</b>        | 344 | 343 |

<sup>a</sup> Quantification ions.



**Table S2** Recoveries (%) and method precision (RSD % for n = 3), limits of detection (LOD) and quantitation (LOQ) for target compounds.

| Compound | Soil                |                 |                |                | Sludge              |                 |                |                | Plant               |                 |                |                |
|----------|---------------------|-----------------|----------------|----------------|---------------------|-----------------|----------------|----------------|---------------------|-----------------|----------------|----------------|
|          | Recoveries<br>%±RSD | Matrix<br>%±RSD | LODs<br>(ng/g) | LOQs<br>(ng/g) | Recoveries<br>%±RSD | Matrix<br>%±RSD | LODs<br>(ng/g) | LOQs<br>(ng/g) | Recoveries<br>%±RSD | Matrix<br>%±RSD | LODs<br>(ng/g) | LOQs<br>(ng/g) |
| UV-326   | 81.7±1.5            | 105±0.1         | 0.10           | 0.32           | 80.5±4.1            | 94.7±6.1        | 2.16           | 7.18           | 71.4±0.4            | 128±4.7         | 1.68           | 5.59           |
| UV-327   | 80.1±0.1            | 102±0.3         | 0.08           | 0.27           | 78.9±3.3            | 84.1±4.0        | 2.77           | 9.23           | 97.0±11.3           | 143±1.4         | 0.40           | 1.34           |
| UV-328   | 80.4±1.0            | 100±1.0         | 0.11           | 0.37           | 70.9±4.6            | 86.7±6.0        | 1.13           | 3.76           | 71.4±6.5            | 143±2.2         | 0.74           | 2.46           |
| UV-329   | 117±1.1             | 153±0.7         | 0.09           | 0.30           | 112±15.2            | 105±21.8        | 1.36           | 4.52           | 96.2±5.8            | 161±3.7         | 0.44           | 1.48           |
| UV-P     | 99.5±4.5            | 136±5.6         | 0.37           | 1.23           | 112±6.1             | 136±4.0         | 3.49           | 11.6           | 85.5±12.1           | 151±5.5         | 0.73           | 2.43           |

**Table S3** Concentrations of BUVSs in the biosolid-amended soils of the old group (OT1, OT2, OT3 and OT4) for one year monitoring.

| Compound | Treatment | Oct 2010             | Nov 2010  | Dec 2010  | Mar 2011  | Apr 2011  | May 2011 | Jun 2011 | Jul 2011  | Aug 2011 | Sep 2011 | Oct 2011               |
|----------|-----------|----------------------|-----------|-----------|-----------|-----------|----------|----------|-----------|----------|----------|------------------------|
| UV-326   | OT1       | 1.0±0.1 <sup>a</sup> | 1.4±0.3   | 1.9±0.1   | 2.6±0.03  | 2.5±0.2   | 1.1±0.2  | 1.2±0.1  | 1.0±0.2   | 0.7±0.4  | 0.8±0.1  | 0.9±0.2 c <sup>b</sup> |
|          | OT2       | 1.4±0.3              | 1.8±0.1   | 2.4±0.2   | 3.1±0.4   | 3.4±0.8   | 1.2±0.3  | 1.1±0.05 | 1.7±0.8   | 0.8±0.2  | 1.0±0.3  | 0.9±0.1 c              |
|          | OT3       | 1.6±0.1              | 2.7±0.3   | 3.6±0.5   | 3.9±0.5   | 3.6±0.2   | 1.8±0.3  | 1.6±0.1  | 3.4±0.6   | 1.5±0.2  | 1.7±0.5  | 1.5±0.3 b              |
|          | OT4       | 3.0±0.7              | 5.5±0.1   | 5.4±0.4   | 6.3±0.9   | 6.2±0.8   | 2.7±0.3  | 1.5±0.1  | 4.4±0.2   | 3.0±0.9  | 2.0±0.2  | 2.3±0.2 a              |
| UV-327   | OT1       | 1.1±0.2              | 1.7±0.3   | 2.7±0.2   | 3.1±0.2   | 3.0±0.3   | 1.7±0.2  | 1.2±0.1  | 1.6±0.2   | 1.2±0.6  | 1.3±0.1  | 1.3±0.1 c              |
|          | OT2       | 1.7±0.2              | 2.3±0.2   | 3.3±0.4   | 3.7±0.7   | 4.4±0.3   | 2.0±0.4  | 1.1±0.1  | 2.4±0.6   | 1.4±0.4  | 1.7±0.3  | 1.5±0.2 c              |
|          | OT3       | 2.0±0.2              | 3.9±0.8   | 4.9±0.3   | 5.1±0.9   | 4.6±0.1   | 2.5±0.2  | 1.9±0.2  | 4.5±0.7   | 2.1±0.5  | 2.4±0.6  | 2.5±0.3 b              |
|          | OT4       | 4.2±0.7              | 7.7±0.5   | 7.1±0.2   | 8.3±0.4   | 8.5±1.3   | 4.0±0.01 | 2.1±0.1  | 7.4±1.0   | 4.5±0.8  | 3.7±1.0  | 3.8±0.5 a              |
| UV-328   | OT1       | 2.3±0.5              | 4.1±0.7   | 4.3±0.6   | 6.1±0.5   | 4.7±0.6   | 2.4±0.7  | 1.6±0.4  | 3.6±0.7   | 2.7±2.2  | 1.7±0.2  | 2.3±0.5 c              |
|          | OT2       | 4.1±0.8              | 6.3±1.4   | 6.4±0.8   | 8.2±2.5   | 7.8±0.5   | 3.3±1.6  | 1.6±0.4  | 6.6±2.4   | 3.1±1.3  | 3.4±1.0  | 2.9±0.9 c              |
|          | OT3       | 6.1±0.5              | 12.4±3.3  | 12.9±1.6  | 13.2±3.4  | 10.7±0.1  | 5.6±0.6  | 4.5±0.7  | 14.3±1.8  | 5.7±1.4  | 6.7±2.3  | 6.6±1.1 b              |
|          | OT4       | 13.3±1.8             | 28.4±2.2  | 17.6±13.3 | 26.2±1.8  | 24.2±4.6  | 11.6±0.4 | 5.2±0.4  | 24.9±3.2  | 14.6±3.3 | 11.1±3.4 | 11.7±1.6 a             |
| UV-329   | OT1       | 5.9±2.8              | 10.4±2.1  | 15.6±6.3  | 16.8±9.3  | 15.6±3.6  | 8.2±4.6  | 6.4±3.1  | 10.7±3.0  | 5.2±3.4  | 2.6±0.1  | 4.4±1.9 c              |
|          | OT2       | 11.6±6.0             | 14.8±1.0  | 22.4±6.6  | 22.6±8.6  | 67.1±27.1 | 10.3±4.6 | 5.1±1.0  | 22.8±14.0 | 6.7±2.6  | 5.9±2.9  | 5.5±0.9 c              |
|          | OT3       | 16.9±2.2             | 29.0±10.2 | 62.3±16.3 | 50.2±15.6 | 66.7±17.6 | 22.1±1.4 | 16.4±3.5 | 46.2±10.6 | 15.4±2.7 | 14.4±4.5 | 12.2±0.9 b             |
|          | OT4       | 30.3±12.6            | 65.6±7.8  | 108±12.9  | 73.7±32.4 | 166±9.1   | 41.4±3.0 | 17.0±0.1 | 69.7±5.7  | 33.1±6.7 | 17.7±4.6 | 20.9±1.8 a             |
| UV-P     | OT1       | 2.3±0.7              | 3.1±0.5   | 3.9±1.0   | 3.8±1.9   | 9.1±4.3   | 4.0±1.1  | 3.3±0.6  | 2.8±0.8   | 2.7±0.9  | 1.7±0.1  | 1.7±0.2 c              |
|          | OT2       | 3.0±1.2              | 4.1±0.1   | 6.1±0.7   | 8.0±1.2   | 23.2±19.2 | 3.1±0.3  | 2.6±0.8  | 5.2±1.5   | 2.5±0.6  | 1.7±0.3  | 2.1±0.2 c              |
|          | OT3       | 3.4±0.5              | 6.2±1.1   | 10.5±3.0  | 10.9±1.4  | 26.1±5.8  | 5.7±1.0  | 5.6±0.3  | 11.5±1.2  | 6.3±1.7  | 2.7±0.8  | 3.4±0.4 b              |
|          | OT4       | 6.9±2.6              | 13.3±1.0  | 18.0±1.0  | 20.3±3.8  | 40.8±4.2  | 7.6±0.6  | 4.9±0.9  | 12.0±0.5  | 8.8±1.8  | 3.6±0.5  | 5.4±0.3 a              |

<sup>a</sup> Mean (ng/g) ± standard deviation (%) (n = 4, replicate samples at the same time).

<sup>b</sup> Letters (a and b) indicate the significant difference of concentration data by Duncan's multiple range test,  $p < 0.05$ .

**Table S4** Concentrations of BUVSs in the biosolid-amended soils of the new group (NT2, NT3 and NT4) for one year monitoring.

| Compound | Treatment | Oct 2010              | Nov 2010 | Dec 2010  | Mar 2011  | Apr 2011  | May 2011 | Jun 2011 | Jul 2011 | Aug 2011 | Sep 2011  | Oct 2011                |
|----------|-----------|-----------------------|----------|-----------|-----------|-----------|----------|----------|----------|----------|-----------|-------------------------|
| UV-326   | NT2       | 1.0±0.03 <sup>a</sup> | 1.0±0.1  | 1.7±0.004 | 2.3±0.02  | 2.3±0.04  | 1.1±0.1  | 1.0±0.3  | 0.7±0.1  | 0.6±0.1  | 0.7±0.1   | 0.7±0.01 b <sup>b</sup> |
|          | NT3       | 1.2±0.003             | 1.1±0.03 | 2.1±0.3   | 2.4±0.1   | 2.5±0.1   | 1.4±0.4  | 1.4±0.1  | 1.6±0.2  | 1.0±0.03 | 0.8±0.03  | 0.8±0.02 b              |
|          | NT4       | 1.1±0.1               | 1.5±0.05 | 2.2±0.1   | 2.9±0.4   | 3.0±0.8   | 2.0±0.3  | 2.4±0.6  | 1.8±0.2  | 0.9±0.1  | 1.2±0.1   | 1.3±0.2 a               |
| UV-327   | NT2       | 0.7±0.0               | 1.0±0.5  | 2.4±0.1   | 2.5±0.1   | 2.7±0.01  | 1.5±0.1  | 1.0±0.02 | 1.1±0.02 | 0.9±0.02 | 1.1±0.1   | 1.1±0.04 b              |
|          | NT3       | 1.3±0.1               | 1.2±0.2  | 2.7±0.3   | 2.5±0.1   | 2.5±0.03  | 1.6±0.5  | 1.1±0.2  | 1.6±0.2  | 1.2±0.2  | 1.2±0.03  | 1.1±0.02 ab             |
|          | NT4       | 0.9±0.1               | 1.6±0.04 | 2.6±0.05  | 2.8±0.4   | 3.1±0.4   | 2.1±0.2  | 2.0±0.6  | 1.8±0.2  | 1.0±0.02 | 1.4±0.2   | 1.5±0.2 a               |
| UV-328   | NT2       | 1.2±0.1               | 1.6±0.7  | 2.6±0.2   | 3.7±0.4   | 3.2±0.1   | 1.9±0.6  | 1.2±0.1  | 1.9±0.1  | 1.3±0.2  | 1.2±0.3   | 1.2±0.2 b               |
|          | NT3       | 1.5±0.1               | 1.5±0.03 | 3.6±1.0   | 4.1±0.2   | 4.0±0.3   | 3.3±0.6  | 1.9±0.7  | 4.0±0.6  | 2.3±0.1  | 1.7±0.05  | 1.6±0.1 b               |
|          | NT4       | 1.5±0.03              | 2.3±0.02 | 3.9±0.5   | 4.8±1.6   | 5.0±2.0   | 4.4±0.7  | 5.1±2.3  | 4.6±0.8  | 1.9±0.1  | 2.8±0.5   | 3.1±0.8 a               |
| UV-329   | NT2       | 2.3±0.3               | 3.5±0.7  | 4.5±0.2   | 8.7±0.9   | 12.7±0.02 | 3.8±1.4  | 3.2±1.9  | 5.7±1.5  | 2.7±0.1  | 1.3±0.2   | 1.7±0.1 b               |
|          | NT3       | 6.2±0.4               | 3.9±0.5  | 13.9±8.4  | 17.9±9.4  | 16.8±2.9  | 16.7±3.6 | 8.8±4.2  | 15.9±3.3 | 5.5±1.1  | 2.8±0.5   | 3.3±0.6 b               |
|          | NT4       | 5.1±0.2               | 7.5±2.3  | 15.7±7.4  | 21.4±14.1 | 31.1±18.1 | 22.6±7.5 | 28.1±9.9 | 27.9±3.4 | 5.7±0.1  | 7.9±0.8   | 8.7±2.5 a               |
| UV-P     | NT2       | 1.7±0.1               | 1.6±0.2  | 1.6±0.1   | 3.6±1.8   | 5.4±0.5   | 1.9±0.2  | 2.2±0.4  | 2.9±1.9  | 2.2±0.4  | 1.6±0.004 | < LOQ <sup>c</sup>      |
|          | NT3       | 2.3±0.7               | 1.9±0.3  | 5.5±2.5   | 6.0±0.6   | 7.2±0.7   | 3.6±0.2  | 3.2±0.5  | 4.0±0.4  | 2.1±0.4  | 1.6±0.01  | < LOQ                   |
|          | NT4       | 2.4±0.2               | 3.0±1.3  | 4.5±2.1   | 9.3±4.5   | 10.9±2.9  | 4.4±0.7  | 9.1±3.5  | 4.2±0.3  | 2.3±0.1  | 2.1±0.3   | 2.6±0.3                 |

<sup>a</sup> Mean (ng/g) ± standard deviation (%) (n = 4, replicate samples at the same time).

<sup>b</sup> Letters (a and b) indicate the significant difference of concentration data by Duncan's multiple range test,  $p < 0.05$ .

<sup>c</sup> < LOQ: below the limit of quantification.
